# Supplementary material for: The Paget's disease of bone risk gene PML is a negative regulator of osteoclast differentiation and bone resorption
Source: PubMed Central journal article supplement (PMC9066519; doi:10.1242/dmm.049318), 2022-04-26
Supplement: dmm-15-049318-s1.pdf [file dmm-15-049318-s1.pdf]

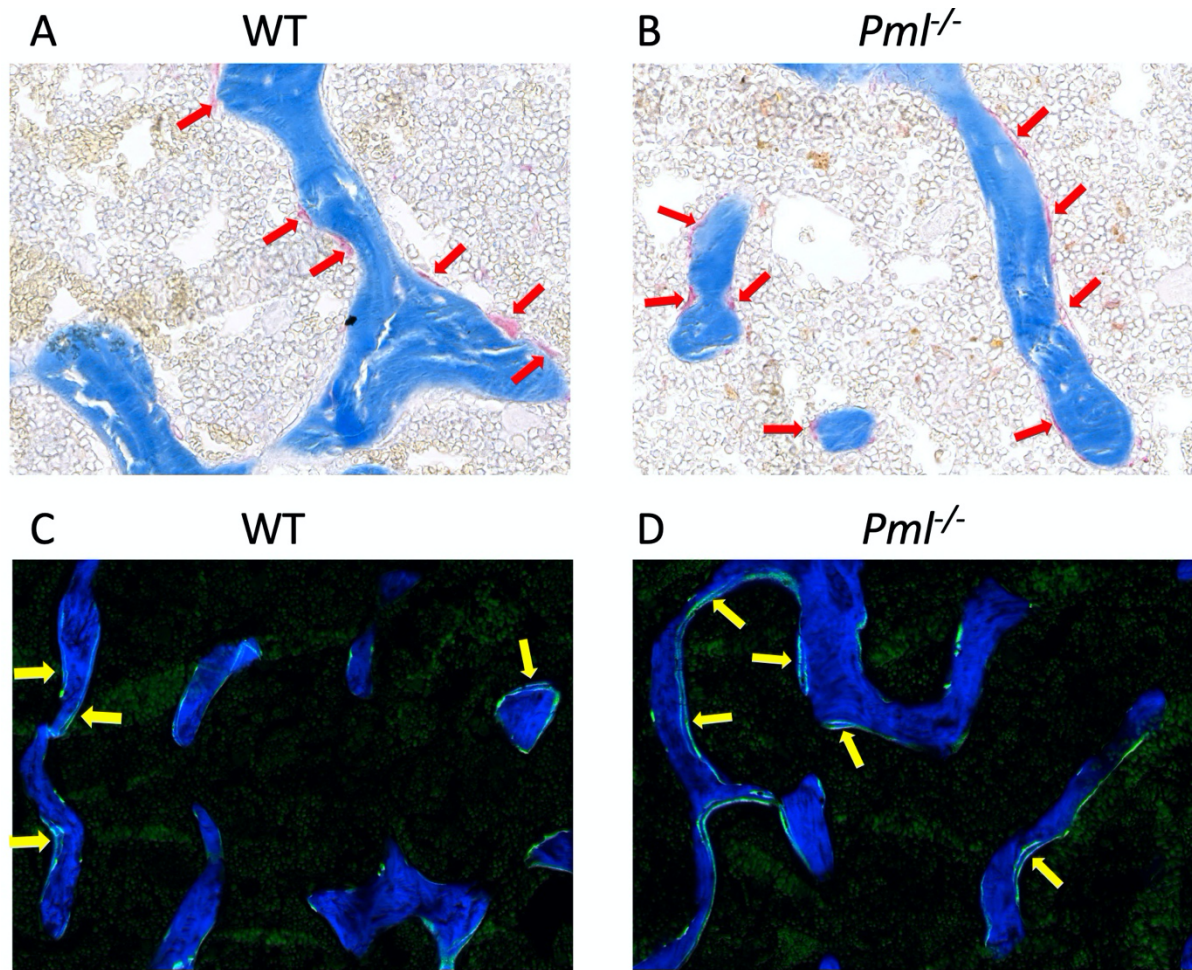

**Fig. S1.** Histomorphometrical analysis of trabecular bone from *Pml*<sup>-/-</sup> mice and WT controls. Representative images of bone sections from the distal femoral metaphysis stained with TRAcP (A,B) or calcein double labelling (C,D). Red arrows indicate TRAcP positive osteoclasts and yellow arrows show calcein double labelled surfaces.

**Table S1. Primers and probes for qRT-PCR.**

| Target Gene    | Primers (5' - 3')<br>(F:Forward; R:Reverse)        | Probe Number | Amplicon (bp) | Species |
|----------------|----------------------------------------------------|--------------|---------------|---------|
| <i>PML</i>     | F: ccgagacccccctctgaag<br>R: cgcagaaactggaactcctc  | 26           | 91            | Human   |
| <i>Pml</i>     | F: tgtcgacaacaggactctgc<br>R: cctcctgtatggcttgcctc | 6            | 112           | Mouse   |
| <i>Nfatc1</i>  | F: tccaaagtcatttctgtgga<br>R: ttgcttccatctcccagac  | 50           | 62            | Mouse   |
| <i>Dcstamp</i> | F: tgggggacttatgtgtttcc<br>R: agactcccaaagtctggatg | 20           | 64            | Mouse   |
| <i>Ctsk</i>    | F: cgaaaagagcctagcgaaca<br>R: tggtagcagcagaaacttg  | 18           | 67            | Mouse   |
| <i>Alpl</i>    | F: cggatcctgaccaaaaacc<br>R: tcatgatgtccgtggtaaat  | 31           | 74            | Mouse   |
| <i>Col1a1</i>  | F: ctctggcaagaatggagat<br>R: aatccacgagcaccctga    | 79           | 91            | Mouse   |

**Table S2. Number of mice (WT and *Pml*<sup>-/-</sup>) scanned by MicroCT and screened for presence of focal PDB-like bone lesions.**

| Mouse Model           | PML knockout |                           |           |                           |
|-----------------------|--------------|---------------------------|-----------|---------------------------|
|                       | 4 months     |                           | 14 months |                           |
| Age group             |              |                           |           |                           |
| Genotype              | WT           | <i>Pml</i> <sup>-/-</sup> | WT        | <i>Pml</i> <sup>-/-</sup> |
| Total (n)             | 8            | 8                         | 8         | 8                         |
| Total with lesion (n) | 0            | 0                         | 0         | 0                         |
